# Supplementary figures and images for: Mammaglobin-A Expression Is Highly Specific for Tumors Derived from the Breast, the Female Genital Tract, and the Salivary Gland
Source: MDPI journal article supplement (doi:10.3390/diagnostics13061202), 2023-03-22

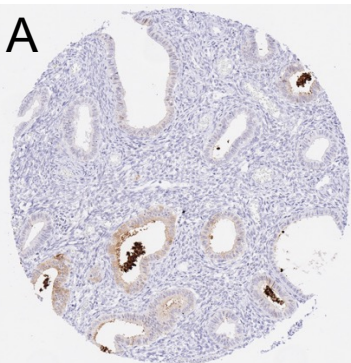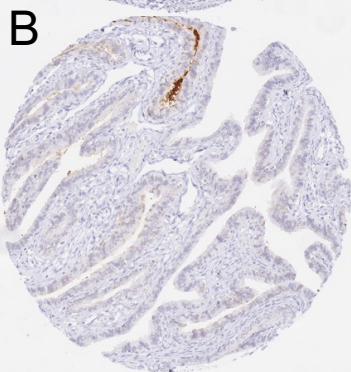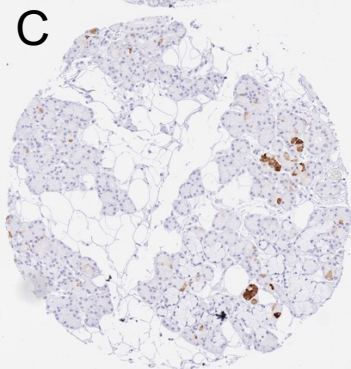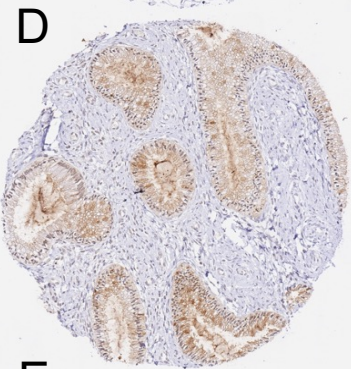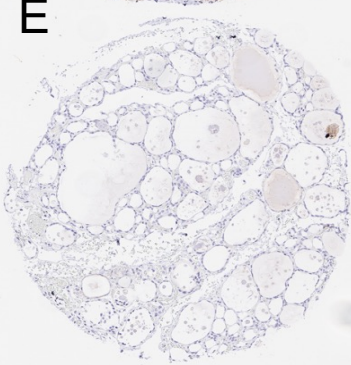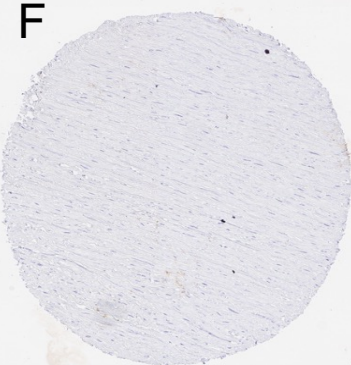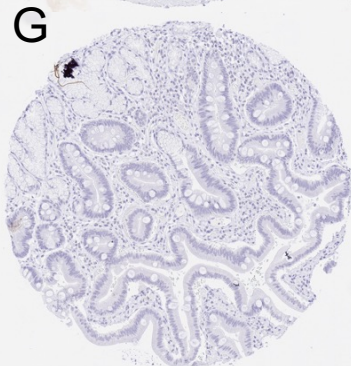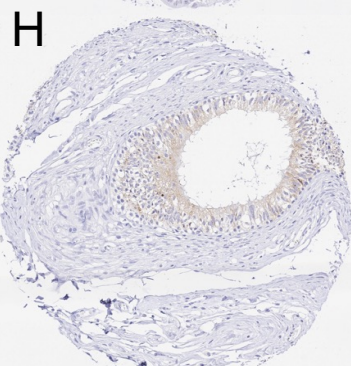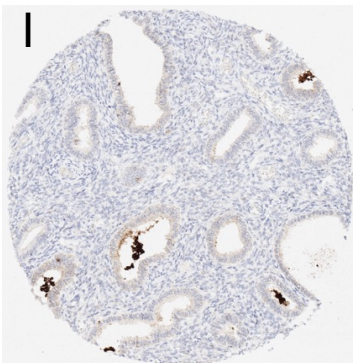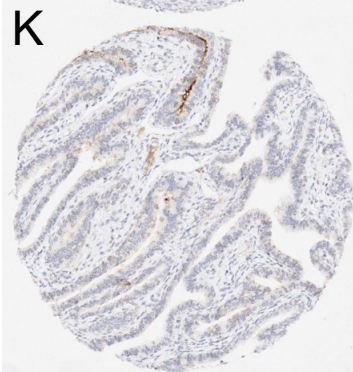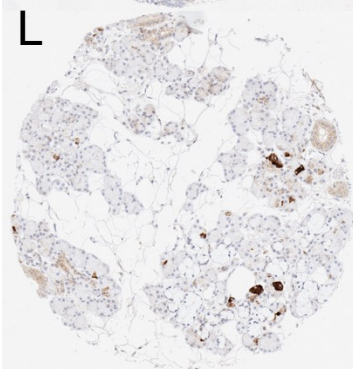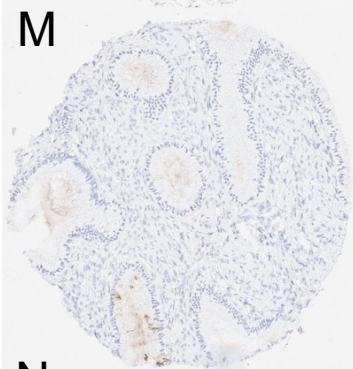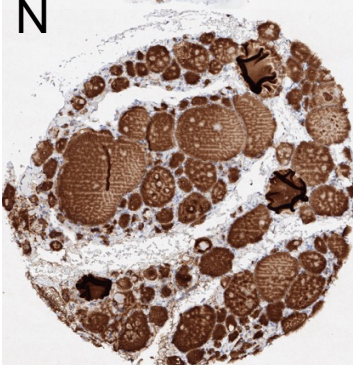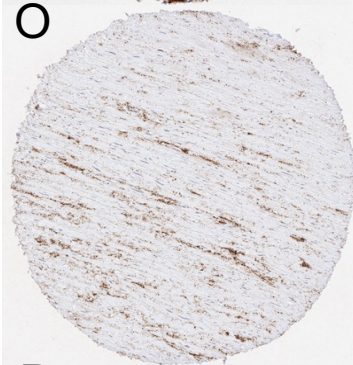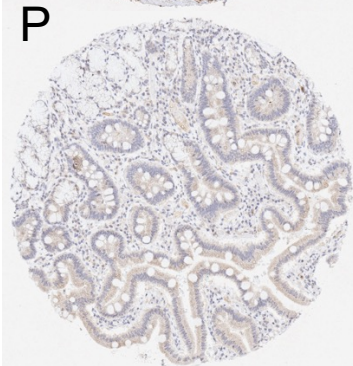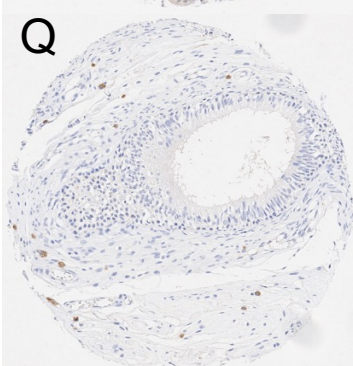

Supplement: s1 [file s1]
